# Supplementary material
Source: PubMed Central journal article supplement (PMC4286202)
Supplement: NIHMS178504-supplement-supp_data.pdf [file NIHMS178504-supplement-supp_data.pdf]

## Supplemental Table I

List of primer pairs, amplicon size and annealing temperature (Ta) of all analysed transcripts.

| Gene Name              | Sense                    | Antisense                 | Amplicon size (bp) | Ta (°C) |
|------------------------|--------------------------|---------------------------|--------------------|---------|
| TAp73 <sup>a</sup>     | GCACCACGTTTGAGCACCTCT    | GCAGATTGAACTGGGCCATGA     | 167                | 51.5    |
| Ex2p73 <sup>a</sup>    | GACGGCTGCAGGGAACCAGA     | TGCCCTCCAGGTGGAAGACG      | 115                | 56.8    |
| Ex2/3 p73 <sup>a</sup> | TGCAGGCCCAGTTCAATCTGC    | TCGGTGTGGAGGGGATGACA      | 178                | 55.3    |
| ΔN'p73 <sup>a</sup>    | TCGACCTTCCCCAGTCAAGC     | TGGGACGAGGCATGGATCTG      | 211                | 59      |
| ΔNp73 <sup>a</sup>     | CAAACGGCCCGCATGTTCCC     | TTGAACTGGGCCGTGGCGAG      | 231                | 58      |
| TAp53                  | CAGACCTATGGAACTACTTCCTGA | GAGCAGCCTCTGGCATTCT       | 153                | 60      |
| ΔNp40                  | CGAAAATTCCATGGGACTGA     | GGGGACAGCATCAAATCATC      | 107                | 60      |
| ΔN133                  | GTTTCTTTGCTGCCGTCTTC     | AATCAACCCACAGCTGCAC       | 153                | 60      |
| Cyclo. A               | GCGTCTCCTTTGAGCTGTTT     | GTCTTGGCAGTGCAGATGAA      | 300                | 55      |
| Actin                  | CACCCACACTGTGCCCATCTA    | CAGCGGAACCGCTCATTGCCAATGG | 294                | 60      |
| GAPDH                  | GGAATCATGACCACAGTCCAT    | GCCATCACGCCACAGTTT        | 81                 | 60      |
| 28S <sup>a</sup>       | TTGAAAATCCGGGGGAGAG      | ACATTGTTCCAACATGCCAG      | 100                | 57      |

a: according to Concin et al. Cancer Res. 2004, 64(7), 2449-2460
